# Supplementary material for: Assessing the impact of anthropogenic pollution on isoprene-derived secondary organic aerosol formation in PM 2.5 collected from the Birmingham, Alabama ground site during the 2013 Southern Oxidant and Aerosol Study
Source: Copernicus journal article supplement (doi:10.5194/acp-2015-983), 2016-01-19
Supplement: Supplementary file [file acp-2015-983-AC1-supplement.pdf]

## Response to Anonymous Referee # 4

We thank Referee # 4 for the comments and address each one below. Our author responses are denoted in blue text.

Interactive comment on “Assessing the impact of anthropogenic pollution on isoprene-derived secondary organic aerosol formation in PM<sub>2.5</sub> collected from the Birmingham, Alabama ground site during the 2013 Southern Oxidant and Aerosol Study” by W.Rattanavaraha et al.

Anonymous Referee # 4

Received and published: 15 February 2016

This paper presents novel data from solvent-extracted filter-collected aerosol in the southeastern United States during the SOAS campaign in summer 2013, which has been analyzed to understand the distribution of isoprene oxidation products, as well as correlated against other measurements to elucidate formation mechanisms of these species. This is a good contribution to understanding of anthropogenic effects on SOA formation from isoprene, and I recommend publication after minor corrections & consideration of a few questions.

### Questions

- 1) On p.16 you describe the slightly lower contribution of the low-NO<sub>x</sub> pathway tracers at your BHM urban site ~93% compared to 97-98% at the more rural sites. Do I understand this contribution analysis correctly to imply that at all 3 sites the overwhelming majority of isoprene SOA tracers are from the “low-NO<sub>x</sub>” pathway? Given that your site is urban, does this suggest that you think of the “high-NO<sub>x</sub>”/“low-NO<sub>x</sub>” split of these tracers is in order? Or, how do you understand the fact that in an urban center with 3-15 ppb NO<sub>x</sub>, only 7% of the isoprene SOA tracers appear to be “high-NO<sub>x</sub>” products?

Yes, at all three sites the overwhelming majority of isoprene SOA tracers are from the low-NO<sub>x</sub> pathway (~93% at urban BHM and 97-98% at rural LRK and YRK). Approximately 2-3% of quantified isoprene SOA tracers appear to be “high-NO<sub>x</sub>” products at LRK (Budisulistiorini et al., 2015) and YRK (Lin et al., 2013b). The MAE/HMML-derived OS and 2-MG may be formed upwind and transported to the rural sampling sites. As stated

below in our response to the reviewer comment # 2, a recent study at CTR demonstrated with the FIGAERO-CIMS that isoprene-derived SOA is effectively nonvolatile, so this material is likely long-lived in PM. This can result in it being transported to our sampling site. Since the vast majority of isoprene is emitted upwind, it is likely that the oxidation products formed outside of the city under lower NO conditions come into contact with urban aerosols (which includes the sulfate aerosol) to form this low-volatility isoprene SOA. Furthermore, At the BHM, 7% of the isoprene SOA tracers are high-NO<sub>x</sub> products (~3%), GA sulfate (~3%), methylglyoxal-derived OS (~0.3%), and other isoprene-derived OSs (~0.7%) as shown in Table 3. GA sulfate is observed as high as a likely “high-NO<sub>x</sub>” product, since it could have additional sources other than isoprene such as anthropogenic VOCs (Galloway et al., 2009; Liao et al., 2015). The contribution of GA sulfate in this study was consistent with the level of GA sulfate measured by the airborne NOAA Particle Analysis Laser Mass Spectrometer (PALMS) over the continental U.S. during the Deep Convection Clouds and Chemistry Experiment and SEAC4RS (Liao et al., 2015). However, GA sulfate and methylglyoxal-derived OS can form from biogenic and anthropogenic emissions other than isoprene (Galloway et al., 2009; Liao et al., 2015). For this reason, GA sulfate and methylglyoxal-derived OS are not further discussed in this study.

- 2) The lack of diurnal variation between avg daytime and nighttime concentrations of isoprene-SOA tracers is interesting. Do you think this is mainly because they are long-lived and formed upwind? Or do you think there might be some offsetting daytime higher source strength and nighttime temperature-driven higher particle partitioning? Maybe add a bit of discussion of this around line 374. As I mention later, I also think the diurnal cycle/day-night comparison supplemental figures should go in the main paper.

We agree with the referee’s comments. We have moved the diurnal cycle/day night comparison figures (now Figures 3-5) from supplemental information into the main text as the referee suggested.

We have also added some discussions as follows on Pages 18-19, Lines 401-414:

*“Figure 3 shows no difference for the average day and night concentration of isoprene-derived SOA tracers, suggesting that the majority of isoprene SOA tracers are potentially long-lived and formed upwind. A recent study by Lopez-Hilfiker et al. (2016) at the CTR site*

*during the 2013 SOAS demonstrated that isoprene-derived SOA was comprised of effectively nonvolatile material, which could allow for this type of SOA to be long-lived in the atmosphere. Although 2-MG and MAE-derived OS are known to form under high-NO<sub>x</sub> conditions (Lin et al., 2013a), no correlation between 2-MG and MAE-derived OS with NO<sub>x</sub> (Table 4) is observed at the BHM. This supports that isoprene SOA tracers likely formed at upwind locations and subsequently transported to the sampling site. Higher isoprene emissions during the daytime and cooler nighttime temperatures do not appear to cause any differences between daytime and nighttime isoprene-derived SOA tracer concentrations. Figures 4 and 5 show the variation of isoprene-derived SOA tracers during intensive sampling periods. The highest concentrations were usually observed in samples collected from 4 pm – 7 pm, local time; however, no statistical significance were observed between intensive periods.”*

- 3) Couldn't the NO<sub>x</sub>/NO<sub>y</sub> plume age correlation with O<sub>3</sub> you mention at the beginning of 3.3.1 be just be a consequence of the relative diurnal variations you mentioned previously in NO<sub>x</sub> and O<sub>3</sub>? Thus, plume age could be actually not changing much... suggest thinking about this in your discussion. Related question pertaining to the negative correlation of plume age and 2-MG mentioned at the top of page 19: do you see a typical diurnal cycle of “plume age”, or is the variation mostly in the day to day differences? (Also related: are we looking at intensives data here or just day/night samples?) I'm wondering if this could just be saying that 2-MG has a pretty consistent diurnal cycle, with a peak in the afternoon after NO<sub>x</sub> has decreased.

*We agree with the referee's suggestion. Please note that we are here looking at the overall data including day, night, and intensive samples together. Only the typical diurnal cycle of “plume age” is observed for comparison.*

*We added some revised text in Section 3.3.1 as follows on Pages 19-20, Lines 425-433:*

*“Plume age, as a ratio of NO<sub>x</sub>:NO<sub>y</sub>, in this study was highly correlated with O<sub>3</sub> ( $r^2 = 0.79$ ,  $n = 120$ ) which is consistent with the relative diurnal variation of NO<sub>x</sub>, NO<sub>y</sub>, and O<sub>3</sub> as discussed in Section 3.1. This correlation might be also explained by the photolysis of NO<sub>2</sub>, which is abundant due to traffic at the urban ground site, resulting in formation of*

*tropospheric O<sub>3</sub>. A negative correlation coefficient ( $r^2 = 0.22$ ,  $n = 120$ ) between plume age and 2-MG abundance was found as a consequence of relative diurnal variations. The peak of 2-MG was observed in the afternoon after NO<sub>x</sub> has decreased. This correlation leads to the hypothesis that the formation of 2-MG may be associated with ageing of air masses; however, further investigation is warranted.”*

- 4) Towards the middle and bottom of p.19 you are talking about both NO<sub>2</sub> and NO<sub>3</sub> enhanced MAE/HMML derived SOA formation. You seem to be assuming that these might have similar structures – my first question: is there a known mechanism for MAE/HMML from NO<sub>3</sub>+isoprene? Because usually NO<sub>3</sub> initiated chemistry retains the NO<sub>3</sub> group, I would expect it to make different products than these. Further down in that paragraph that goes on to the next page: I don't think it's at all obvious that high-NO<sub>x</sub> SOA tracers would be the same as NO<sub>3</sub> chemistry tracers – the nitrate group is at a different position in the molecule when formed via isop RO<sub>2</sub>+NO vs. NO<sub>3</sub>+isoprene chemistry.

To our knowledge, the mechanism for MAE/HMML from NO<sub>3</sub> + isoprene is still unknown. We agree with the referee's suggestion that high-NO<sub>x</sub> SOA tracers would not be the same as NO<sub>3</sub> chemistry tracers. Thus, we only reported the correlation we have observed at the site in this study and note that further work is needed to examine the potential role of nighttime NO<sub>3</sub> radicals in forming MAE/HMML-derived SOA tracers.

**Minor suggestions/edits:**

- 1) **Line 52:** “indicates that” => “is consistent with the observation that”

We edited the sentence at the referee suggested as follows on Page 3, Lines 51-55:

*“Lack of correlation between aerosol acidity and isoprene-derived SOA is consistent with the observation that acidity is not a limiting factor for isoprene SOA formation at the BHM site as aerosols were acidic enough to promote multiphase chemistry of isoprene-derived epoxides throughout the duration of the study.”*

- 2) **Line 54:** “the reports” =>“previous studies suggesting”?

We edited the sentences as the referee suggested as follows on Page 3, Lines 54-55:

*“All in all, these results confirm previous studies suggesting that anthropogenic pollutants enhance isoprene-derived SOA formation.”*

- 3) **Line 61:** remove “potential”?

We removed “potential” in front of “human health risk” as the referee suggested as follows on Page 3, Line 61-62:

*“In addition to climatic effects, PM<sub>2.5</sub> has been demonstrated to pose a human health risk through inhalation exposure (Pope and Dockery, 2006; Hallquist et al., 2009).”*

- 4) **Lines 72-73:** add mention of biogenic sources of VOCs here too

We edited the sentences as the referee suggested as follows on Page 4, Lines 72-76:

*“Processes such as natural plant growth, biomass burning and combustion also yield volatile organic compounds (VOCs), which have high vapor pressures and can undergo atmospheric oxidation to form secondary organic aerosol (SOA) through gas-to-particle phase partitioning (condensation or nucleation) with subsequent particle-phase (multiphase) chemical reactions (Grieshop et al., 2009).”*

- 5) **Lines 90-91:** phrase “isomeric isoprene epoxydiols” is a bit confusing-maybe “multiple isomers of isoprene epoxydiols”?

We edited the sentences as the referee suggested as follows on Page 4, Lines 90-92:

*“Under low-NO<sub>x</sub> conditions, such as in a pristine environment, multiple isomers of isoprene epoxydiols (IEPOX) have been demonstrated to be critical to the formation of isoprene SOA.”*

- 6) **Line 111:** “considerable” doesn’t sound quantitative-maybe “large”?

We edited the sentences as the referee suggested as follows on Page 6, Lines 118-119:

*“Due to the large emissions of isoprene, an SOA yield of even 1% would contribute*

*significantly to ambient SOA (Carlton et al., 2009; Henze et al., 2009)."*

- 7) **Line 120:** "estimates" => "estimated"

We edited the sentences as the referee suggested as follows on Pages 6, Lines 125-128:

*"The individual ground sites corroborate recent aircraft-based measurements made in the Studies of Emissions and Atmospheric Composition, Clouds, and Climate Coupling by Regional Surveys (SEAC4RS) aircraft campaign, which estimated an IEPOX-SOA contribution of 32% to OA mass in the southeastern U.S. (Hu et al., 2015)."*

- 8) **Lines 122-123:** I think it hadn't yet been stated that IEPOX is necessarily formed in the particle phase—a brief explanation somewhere before this conclusive statement would be good.

We thank the referee for this point. The particle-phase formation of IEPOX has been mentioned earlier on Pages 4-5, Lines 90-101, where all prior references were cited:

*"Under low-NO<sub>x</sub> conditions, such as in a pristine environment, multiple isomers of isoprene epoxydiols (IEPOX) have been demonstrated to be critical to the formation of isoprene SOA. On advection of IEPOX to an urban environment and mixing with anthropogenic emissions of acidic sulfate aerosol, SOA formation is enhanced (Surratt et al., 2006; Lin et al., 2012; Lin et al., 2013b). This pathway has been shown to yield 2-methyltetrols as major SOA constituents of ambient PM<sub>2.5</sub> (Claeys et al., 2004; Surratt et al., 2010; Lin et al., 2012). Further work has revealed a number of additional IEPOX-derived SOA tracers, including C<sub>5</sub>-alkene triols (Wang et al., 2005; Lin et al., 2012), cis- and trans-3-methyltetrahydrofuran-3,4-diols (3-MeTHF-3,4-diols) (Lin et al., 2012; Zhang et al., 2012), IEPOX-derived organosulfates (OSs) (Lin et al., 2012), and IEPOX-derived oligomers (Lin et al., 2014). Some of the IEPOX-derived oligomers have been shown to contribute to aerosol components known as brown carbon that absorb light in the near ultraviolet (UV) and visible ranges (Lin et al., 2014)."*

- 9) **Around lines 129-130:** does this addition only increase accuracy of isoprene SOA prediction, or total SOA prediction more generally?

It improves both. We have revised the sentence as follows on Pages 6-7, Lines 135-140:

*“Recent work demonstrates that incorporating the specific chemistry of isoprene epoxide precursors into models increases the accuracy and amount of isoprene SOA predictions (Pye et al., 2013; Karambelas et al., 2014; McNeill., 2015), suggesting that understanding the formation mechanisms of biogenic SOA, especially with regard to the effects of anthropogenic emissions, such as  $\text{NO}_x$  and  $\text{SO}_2$ , will be key to more accurate models.”*

10) **Lines 133-136:** a little unclear– I think what you mean to say here is in order to develop feasible control strategies, not in order to understand?

By writing on Page 7, Lines 140-143: *“More accurate models are needed in order to devise cost-effective control strategies for reducing  $\text{PM}_{2.5}$  levels. Since isoprene is primarily biogenic in origin, and therefore not controllable, the key to understanding the public health and environmental implications of isoprene SOA lies in resolving the effects of anthropogenic pollutants.”*, we intend to understand the roles of isoprene SOA formation associated with uncontrollable biogenic emissions and controllable anthropogenic emissions, so that the control strategies will be developed in the future based on the anthropogenic emissions.

11) **Line 145:** mention here that you’re talking about filter collected also in BHM (right?), not just as part of SOAS.

We introduced, in general, that primary purpose of SOAS campaign was to examine, in greater detail, the formation mechanism, composition, and properties of biogenic SOA, including the effects of anthropogenic emissions. However, this study pertains specifically to the results from the BHM site, which also served the primary purpose of the SOAS campaign and was apart of the SOAS study. We were funded by EPRI to have filters collected during SOAS as this site.

12) **Lines 146-148:** you’ve already introduced these acronyms, so I think you can just use the abbreviations here.

We already introduced the GC/EI-MS and UPLC/ESI-HR-QTOFMS in the abstract. Thus, as the referee suggested, we edited the sentences on Page 7, Line 151-152 as follows:

*“The results presented here focus on analysis of PM<sub>2.5</sub> collected on filters during the campaign by GC/EI-MS and UPLC/ESI-HR-OTOFMS.”*

- 13) **Line 188:** suggest to add a bit more details here which (relevant) trace gases were measured, and that they were measured continuous as well.

We added some additional information as the referee suggested as follows on Page 9, Lines 191-195:

*“In addition to filter sampling of PM<sub>2.5</sub>, SEARCH provided a suite of additional instruments at the site that measured meteorological and chemical variables, including temperature, relative humidity (RH), trace gases (i.e., CO, O<sub>3</sub>, SO<sub>2</sub>, NO<sub>x</sub>, and NH<sub>3</sub>), and continuous PM monitoring. The exact variables measured with their respective instrumentation are summarized in Table S1 of the Supplement”*

- 14) **Around line 199:** suggest adding a brief discussion here of the target functional group of the derivatization – what chemical conversion are you doing, and what class of compounds does it enable quantifying?

We added some information as the referee suggested as follows on Page 9, Lines 203-206:

*“The dried residues were immediately trimethylsilylated by reaction with 100  $\mu$ L of BSTFA + TMCS (99:1 v/v, Supelco) and 50  $\mu$ L of pyridine (anhydrous, 99.8 %, Sigma-Aldrich) at 70  $^{\circ}$ C for 1 hour. Trimethylsilyl derivatives of carbonyl and hydroxyl function groups were measurable by our GC/MS method.”*

- 15) **Around line 220-221:** Are you analyzing derivatized or not in this case? It’s unclear from the way you reference section 2.2.1. Also I think you mean to refer to section 2.2.2.

We meant to refer to Section 2.2.2 for the filter extraction procedure. We corrected the reference section as the referee suggested as follows on Page 11, Lines 233-239:

*“A 37-mm diameter circular punch from each quartz filter was extracted following the same procedure as described in Section 2.2.2 for the GC/EI-MS analysis. However, after drying,*



*the dried residues were instead reconstituted with 150 µl of a 50:50 (v/v) solvent mixture of methanol (LC-MS CHROMASOVL-grade, Sigma-Aldrich) and high-purity water (Milli-Q, 18.2 MΩ). The extracts were immediately analyzed by the UPLC/ESI-HR-QTOFMS (6520 Series, Agilent) operated in the negative ion mode. Detailed operating conditions have been described elsewhere (Riva et al., 2016). Mass spectra were acquired at a mass resolution 7000-8000.”*

16) **Line 290:** omit “~” in front of temperature

We removed “~” in front of temperature as the referee suggested as follows on Page 14, Lines 310-311:

*“Temperature during this period ranged from a high of 32.6 °C to a low of 20.5 °C, with an average of 26.4 °C.”*

17) **Line 299:** do you mean to again compare intensive days to regular days with the “lower”? If so, I recommend mentioned also the averages for intensive days, with parallel structure to the sentence above: “on intensive days, compared to..., ...and... on regular sampling days.” Or, if you actually meant to compare to the concentration of O<sub>3</sub> itself, I don’t understand why.

We only want to present the order of magnitudes of trace gases. Thus, the comparison here was generally made among different trace gases without pointing at any specific sampling time. To be clear, we removed the word “lower” in front of “were averaging 7.8” as follows on Page 15, Lines 317-320:

*“The average concentration of carbon monoxide (CO), a combustion byproduct, was 208.7 ppbv. The mean concentration of O<sub>3</sub> was significantly higher (t-test, p-value < 0.05) on intensive sampling days (37.0 ppbv) compared to regular sampling days (25.2 ppbv). Campaign average concentrations of NO<sub>x</sub>, NH<sub>3</sub>, and SO<sub>2</sub> were 7.8, 1.9, and 0.9 ppbv, respectively.”*

18) **Line 307-308:** don’t you have a direct measurement of OC that you could also compare to the Budis and Hu2015 references’ values to confirm your hypothesis here?

Unfortunately, only WSOC/OC are reported in previous publications (Budisulistiorini et al.,

2015; Hu et al., 2015) used here for the comparison.

19) **Line 312:** remove hyphen in “High-NO<sub>x</sub>” since it’s not used as an adjective here.

We removed the hyphen in “High-NO<sub>x</sub>” as the referee suggested as follows on Page 15, Lines 333-335:

*“High NO<sub>x</sub> levels were found in the early morning and decreased during the course of the day (Figure S4c), most likely due to forming NO<sub>x</sub> sinks (e.g., RONO<sub>2</sub>, ROONO<sub>2</sub>, and HNO<sub>3</sub>) as well as possibly due to increasing planetary boundary layer (PBL) heights.”*

20) **Line 313:** “most likely in conjunction with rising O<sub>3</sub> levels”: what does this mean? are you suggesting the major NO<sub>x</sub> loss is to reaction with O<sub>3</sub>? I think rather you’re making RONO<sub>2</sub>/ROONO<sub>2</sub>/HNO<sub>3</sub> and also the BL height is increasing-and NO<sub>x</sub> emissions peak at rush hour, while O<sub>3</sub> production cranks along all day driven by radiation. So, NO<sub>2</sub> goes down while O<sub>3</sub> goes up, but in my opinion, "in conjunction with" suggests a direct chemical connection that isn’t likely the major reason they show the opposite trend.

We have revised as the referee suggested as outlined in our response above to comment # 19.

21) **Line 323:** the referred to AMS here was at CTR, correct? Suggest you say so.

Yes, it referred to AMS at CTR. We have revised this as follows on Page 16, Lines 341-345:

*“However, the diurnal trend of isoprene levels might be similar to the data at the CTR site (Xu et al., 2015), which is only 61 miles away from BHM. Xu et al. (2015) observed the highest levels of isoprene (~ 6 ppb) at CTR in the mid-afternoon (3 pm local time) and its diurnal trend was similar to isoprene-OA measured by the Aerodyne Aerosol Mass Spectrometer (AMS) during the SOAS campaign at the CTR site.”*

22) **Line 354:** suggest “ranging up to”

We agree with the referee’s suggestion. We added the wording as the referee suggested on Page 17, Lines 379-381:

*“On average, isoprene-derived SOA tracers (sum of both IEPOX- and MAE/HMML-derived*

*SOA tracers) contributed ~7% (ranging up to ~ 20% at times) of the total particulate OM mass.”*

23) **Line 359:** “was” => “were”

We agree with the referee’s suggestion. We corrected the wording as the referee suggested on Page 17, Lines 384-385:

*“..., while tracer estimates in the two earlier studies were based on online ACSM/AMS measurements.”*

24) **Line 360:** “ an increased” => “a larger”

We agree with the referee’s suggestion. We corrected the wording as the referee suggested on Pages 17-18, Lines 385-387:

*“The low isoprene SOA/OM ratio is consistent with the low WSOC/OC reported in Section 3.1, suggesting a larger contribution of primary OA or hydrophobic secondary OM originating from anthropogenic emissions to the total OM at BHM.”*

25) **Line 365-366:** “of that...OM mass.” awkward phrasing–suggest rewording.

We revised wording as the referee suggested on Page 18, Lines 391-393:

*“Unfortunately, an Aerodyne ACSM or AMS was not available at the BHM site to support the confirmation that IEPOX-derived SOA mass at BHM might account for 14% (on average) of the total OM mass.”*

26) **Line 367:** start a new paragraph at “Levoglucosan...”?

We agree with the referee’s suggestion. We made a new paragraph on Page 18, Lines 394-397:

*“Levoglucosan, a biomass-burning tracer, averaged 1% of total OM with spikes up to 8%, the same level measured for 2-methylthreitol and (E)-2-methylbut-3-ene-1,2,4-triol (Table 3). The ratio of average levoglucosan at BHM relative to CTR was 5.4, suggesting significantly*

*more biomass burning impacting the BHM site.”*

- 27) **Line 369-370:** more BB influence at the urban site! This surprises me—why do you think this would be the case? Is there any other confirmatory evidence of this? Or are there other possible sources in an urban area? I would have thought rural areas would have more BB contributions, because of regional crop burning....

Although BHM is an urban site, but it's surrounded by terrestrial forests and only 61 miles away from the rural CTR sampling site. It might be possible that the BHM is affected by biomass burning around the area. The wind rose (Figure 1) illustrated that majority of the wind during the campaign came from southwest and west of the site related to terrestrial forests. An increased biomass-burning tracer at the BHM might be influenced by human activities including cooking and burning. However, investigating the sources of biomass burning is out of scope of this study.

- 28) **Line 375:** remove “also”

We agree with the referee's suggestion. We removed as suggested.

- 29) **Line 378:** now you are talking about there BEING some diurnal variation, where the beginning of this paragraph talks about no difference day/night. I suggest reworking the text to clarify—I guess you're looking at different sets of samples, but it's confusing as written.

We agree with the referee's suggestion. The revised sentences are shown as follows on Pages 18-19, Lines 401-414:

*“Figure 3 shows no difference for the average day and night concentration of isoprene-derived SOA tracers, suggesting that the majority of isoprene SOA tracers are potentially long-lived and formed upwind. A recent study by Lopez-Hilfiker et al. (2016) at the CTR site during the 2013 SOAS demonstrated that isoprene-derived SOA was comprised of effectively nonvolatile material, which could allow for this type of SOA to be long-lived in the atmosphere. Although 2-MG and MAE-derived OS are known to form under high-NO<sub>x</sub> conditions (Lin et al., 2013a), no correlation between 2-MG and MAE-derived OS with NO<sub>x</sub> (Table 4) is observed at the BHM. This supports that isoprene SOA tracers likely formed at upwind locations and subsequently transported to the sampling site. Higher isoprene*

*emissions during the daytime and cooler nighttime temperatures do not appear to cause any differences between daytime and nighttime isoprene-derived SOA tracer concentrations. Figures 4 and 5 show the variation of isoprene-derived SOA tracers during intensive sampling periods. The highest concentrations were usually observed in samples collected from 4 pm – 7 pm, local time; however, no statistical significance were observed between intensive periods.”*

- 30) **Line 379:** do you mean no stat.sig. DIFFERENCE between periods? And, do you mean between different times of day within the intensives, or between different 2-day intensive sampling periods? (I have the same question in some of the SI captions)

We mean no significantly difference among intensive 1, 2, 3, and 4.

- 31) **Line 393:** first report of an “r” instead of  $r^2$ ... makes comparison sticky. Maybe just keep as  $r^2$  but mention the correlation is negative?

We agree with the referee’s suggestion. The revised sentences are shown as follows on Pages 19-20, Lines 429-431:

*“A negative correlation coefficient ( $r^2 = 0.22$ ,  $n = 120$ ) between plume age and 2-MG abundance was found as a consequence of relative diurnal variations.”*

- 32) **Line 404:** concentration would only increase with lowering PBL height if isoprene continues to be emitted at night. Is it?

No isoprene emits at night, but the remaining isoprene from daytime can carry to nighttime and will be concentrated with lowering PBL.

- 33) **Line 406:** if MPAN oxidation is responsible for 2-MG formation, you’d need to see the  $\text{NO}_2$  correlation, which you don’t, correct?

We don’t see the correlation between 2-MG formation and  $\text{NO}_2$  at the site, which is why we hypothesized that 2-MG might be formed upwind and transported to the site.

- 34) **Line 419:** “initiated” (spelling error)

We corrected a spelling error as the referee suggested.

35) **Lines 424-428:** this isn't super clear : are you saying that Ng 2008 didn't see this correlation because they didn't have  $\text{RO}_2+\text{HO}_2$  reactions, and you're attributing your observation of a weak correlation to those  $\text{RO}_2+\text{HO}_2$  rxns and not  $\text{RO}_2+\text{RO}_2$  or  $\text{RO}_2+\text{NO}_3$ , which Ng would have observed exclusively? Suggesting reworking the text.

We revised the text as the referee suggested as follows Page 21, Lines 462-467:

*“The work of Ng et al. (2008), which only observed SOA as a consequence of the  $\text{RO}_2 + \text{RO}_2$  and  $\text{RO}_2 + \text{NO}_3$  reactions dominating the fate of the  $\text{RO}_2$  radicals, does not explain the weak association between IEPOX-derived SOA tracers and  $P[\text{NO}_3]$  we observe in this study. It is now thought that  $\text{RO}_2 + \text{HO}_2$  should dominate the fate of  $\text{RO}_2$  radicals in the atmosphere (Paulot et al., 2009; Schwantes et al., 2015).”*

36) **Line 452:** suggest “putative” => “potential”

We corrected the wording as the referee suggested.

37) **Line 475:** briefly explain “salting-in” chemistry

We added a briefly explanation of salting-in in the text as follows on Pages 23-24, Lines 521-525:

*“Another potential pathway for  $\text{SO}_4^{2-}$  levels to enhance isoprene SOA formation is through salting-in effects, which the solubility of polar organic compounds would be increased in aqueous solution with increasing salt concentration (Xu et al., 2015). However, systematic investigations of this effect are lacking and further studies are warranted.”*

38) **Lines 485-486:** “may stem from... campaign”: add, or the fact that it was always plenty acidic and thus not at all pH-limited! (not just that it was relatively constant)

We agree with the referee's suggestion. We added the information in the text as follows on Page 24, Lines 533-535:

*“However, it is important to point out that the lack of correlation between SOA tracers and acidity may stem from the small variations in aerosol acidity and the fact that aerosols are*

*very acidic throughout the campaign.”*

- 39) **Lines 498/499:** depending on how you end up discussing this high-NO<sub>x</sub>/low-NO<sub>x</sub> idea, consider reminding the reader here of which products correspond to which NO<sub>x</sub> regime.

We added the information the referee suggested as follows on Page 25, Lines 547-550:

*“IEPOX-derived SOA (isoprene SOA produced under low-NO<sub>x</sub> conditions) was predominant at all three sites during the SOAS campaign, while MAE/HMML-derived SOA (isoprene SOA produced under high-NO<sub>x</sub> conditions) constituted a minor contribution.”*

- 40) **Line 504:** you mean specifically, without the intermediate of IEPOX, right? If so, say so.

We added the information the referee suggested as follows on Page 25, Lines 553-557:

*“Riva et al. (2016) recently demonstrated that only 2-methyltetrols can be formed via isoprene ozonolysis in the presence of acidic sulfate aerosol. The detailed mechanism explaining isoprene ozonolysis is still unclear, but acid-catalyzed heterogeneous reaction with organic peroxides or H<sub>2</sub>O<sub>2</sub> was considered to be possible routes for 2-methyltetrol formation.”*

- 41) **Line 522:** “effect”=>“affect”

We corrected the word as the referee suggested on Page 26, Lines 573-575:

*“Differences in the relative contributions of IEPOX- and MAE/HMML-derived SOA tracers at BHM and the rural CTR and LRK sites (Budisulistiorini et al., 2015) during the 2013 SOAS campaign, support suggestions that anthropogenic emissions affect isoprene SOA formation.”*

- 42) **Lines 534-536:** “in addition... regimes.” Seems to be introducing some new ideas –be sure you say something about this above in the main text.

We agree with the referee’s suggestion. We removed the following statement because we didn’t discuss about 2-methyltetrols and nighttime NO<sub>x</sub> in the main text:

*“In addition, nighttime 2-methyltetrol levels in the urban atmosphere deviate from the conventional understanding of isoprene SOA formation in terms of segregated NO<sub>x</sub> dependent regimes.”*

- 43) **Lines 439-545:** “In this study ... (Riva et al., 2015).” I think the bulk of this text should go above in 3.3.2. with just a summary here - seems like you’re presenting some new correlations here in the conclusions section.

We have already discussed these correlations in Section 3.3.2.

- 44) **Lines 555-556:** again, nearly invariant and ALWAYS very acidic is the key I think you’re trying to present here.

We emphasized that aerosols are very acidic in this revised text on Page 27, Lines 603-607:

*“The absence of a correlation of aerosol acidity with MAE/HMML- and IEPOX-derived SOA tracers indicates that acidity is not the limiting variable that controls formation of these compounds. Because the aerosols are acidic (campaign average aerosol pH of 1.8), the lack of correlation between SOA tracers and acidity may stem from the nearly invariant aerosol acidity throughout the campaign.”*

- 45) **Line 560:** “since urban emissions are directly present” => “in the presence of fresh urban emissions”

We agree with the referee’s suggestion. We revised the sentences as follows on Page 27, Lines 611-612:

*“Future work should examine how well current models can predict the isoprene SOA levels observed during this study, especially in the presence of fresh urban emissions.”*

- 46) **Table 1:** the periods for the intensive aren’t clear to me- the 4 sampling periods suggest coverage of 2 days, but these periods list 3 days-?

The 4 sampling periods suggest coverage of 2 days, and these schedules are run for 3 days. Detailed examples of intensive periods during June 10 – 12 and regular (day/night) on June 13 are consecutively illustrated in this table to aid in understanding the sampling schedule:



| <b>Sampling period</b> | <b>Sampling start</b> | <b>Sampling stop</b>        |
|------------------------|-----------------------|-----------------------------|
| Intensive 1            | 06/10/2013, 8 am      | 06/10/2013, 12 pm           |
| Intensive 2            | 06/10/2013, 1 pm      | 06/10/2013, 3 pm            |
| Intensive 3            | 06/10/2013, 4 pm      | 06/10/2013, 7 pm            |
| Intensive 4            | 06/10/2013, 8 pm      | 06/11/2013, 7 am (next day) |
| Intensive 1            | 06/11/2013, 8 am      | 06/11/2013, 12 pm           |
| Intensive 2            | 06/11/2013, 1 pm      | 06/11/2013, 3 pm            |
| Intensive 3            | 06/11/2013, 4 pm      | 06/11/2013, 7 pm            |
| Intensive 4            | 06/11/2013, 8 pm      | 06/12/2013, 7 am (next day) |
| Intensive 1            | 06/12/2013, 8 am      | 06/12/2013, 12 pm           |
| Intensive 2            | 06/12/2013, 1 pm      | 06/12/2013, 3 pm            |
| Intensive 3            | 06/12/2013, 4 pm      | 06/12/2013, 7 pm            |
| Intensive 4            | 06/12/2013, 8 pm      | 06/13/2013, 7 am (next day) |
| Regular daytime        | 06/13/2013, 8 am      | 06/13/2013, 7 pm            |
| Regular nighttime      | 06/13/2013, 8 pm      | 06/14/2013, 7 am (next day) |

This information is already summarized concisely in Table 1 of the main text.

47) **In table 4:** I assume the bold lines are aggregated tracers for MAE/HMML vs. IEPOX?

Explain in the caption

We added the following footnotes in Table 4 as the referee suggested to explain this:

“\*Summed tracers for MAE/HMML-derived SOA”

“\*\*Summed tracers for IEPOX-derived SOA”

48) **Table5:** “average amount detected tracers” => “average fraction of detected tracers”

We corrected the column titles in Table 5 as the referee suggested here.

49) **Fig.2:** Looks like NO<sub>x</sub> peaks are mostly during fires, based on CO spikes concurrent? Does this affect any of the plume age analysis? It’s quite hard to discern any day/night patterns here - maybe average day & night values, with SD bars, for some key metrics would be a good figure to include in the main body text? Also, add your plume age calc here to the time

series? I'm curious how much it varies over the campaign vs. has a typical diurnal pattern.

CO correlated with  $\text{NO}_x$  ( $r^2 = 0.39$ ) suggesting the sources of combustion including fires and tailpipe emissions. This effect wasn't included in the plume age analysis in this study. The diurnal plots of key parameters in Figure 2 have been shown separately for better visibility in Figure 3-5 and Figure S4 in SI. The plume ages ( $\text{NO}_x:\text{NO}_y$ ) were 0.37 – 1.02 over the course of sampling period. The authors decided not to include plume ages in time series plot for simplicity as plume age didn't provide major information for the analysis. However, we are providing the times series and diurnal plot here for the referee's information.

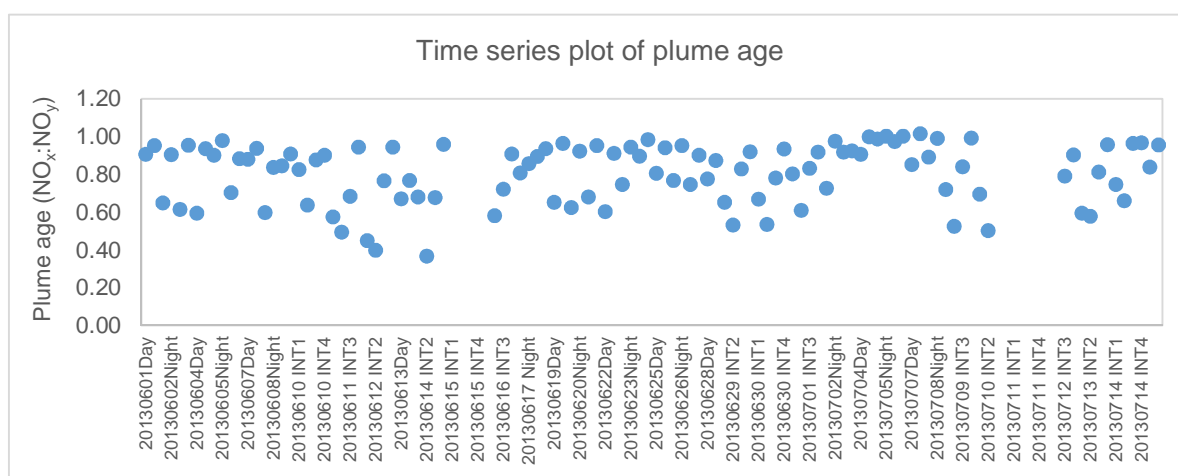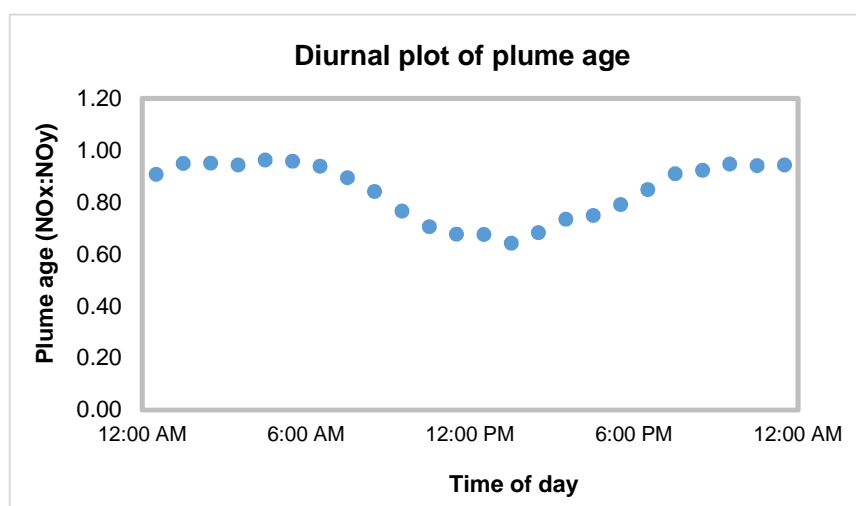

50) **In caption of Fig. 4:** say something about this being a smaller fraction than Fig.3 –because significantly weaker correlation.

We added the information to the caption as the referee suggested. Please note that the figure

number changed from 4 to 7 because we moved some figures from SI to the main body of the paper.

*“Figure 7. Correlation of IEPOX-derived SOA tracers with (a) daytime NO<sub>2</sub>, (b) daytime O<sub>3</sub>, (c) daytime P[NO<sub>3</sub>], (d) nighttime NO<sub>2</sub>, (e) nighttime O<sub>3</sub>, and (f) nighttime P[NO<sub>3</sub>]. Nighttime P[NO<sub>3</sub>] correlation suggests that NO<sub>3</sub> radical chemistry could explain some fraction of the IEPOX-derived SOA tracer concentrations. The contribution of nighttime P[NO<sub>3</sub>] to IEPOX-derived SOA would be smaller than MAE/HMML-derived SOA due to the weaker correlation.”*

**SI: I would put S5-S7 in the main body of the paper.** Also, in those captions, when you say there is "no significant variation was observed amongst intensive samples", do you mean to compare different date periods where you did the 4 time chunks, or do you mean between the 4 time chunks over all of the date periods where you did that finer time resolution, or both? Please clarify an SI figure with a couple key structures & corresponding acronyms would be nice (MAE,HMML,etc.)

Figures S5-S7 have been moved to the main body of the paper as the referee suggested. “No significant variation was observed amongst intensive samples” means between the time chunks over all of the date periods where we did that finer time resolution. All figures in SI have been revised for the key structures & corresponding acronyms.

## References

- Budisulistiorini, S., Li, X., Bairai, S., Renfro, J., Liu, Y., Liu, Y., McKinney, K., Martin, S., McNeill, V., and Pye, H.: Examining the effects of anthropogenic emissions on isoprene-derived secondary organic aerosol formation during the 2013 Southern Oxidant and Aerosol Study (SOAS) at the Look Rock, Tennessee, ground site, Atmos. Chem. Phys. Discuss., 15, 7365-7417, 2015.
- Claeys, M., Graham, B., Vas, G., Wang, W., Vermeylen, R., Pashynska, V., Cafmeyer, J., Guyon, P., Andreae, M. O., and Artaxo, P.: Formation of secondary organic aerosols through photooxidation of isoprene, Science, 303, 1173-1176, 2004.
- Galloway, M. M., Chhabra, P. S., Chan, A. W. H., Surratt, J. D., Flagan, R. C., Seinfeld, J. H., and Keutsch, F. N.: Glyoxal uptake on ammonium sulphate seed aerosol: reaction

products and reversibility of uptake under dark and irradiated conditions, *Atmos. Chem. Phys.*, 9, 3331-3345, 10.5194/acp-9-3331-2009, 2009.

- Grieshop, A., P., Logue, J., M., Donahue, J., M., and Robinson, A., L.: Laboratory investigation of photochemical oxidation of organic aerosol from wood fires 1 : measurement and simulation of organic aerosol evolution, *Atmos. Chem. Phys.*, 9, 1263-1277, 2009.
- Hallquist, M., Wenger, J. C., Baltensperger, U., Rudich, Y., Simpson, D., Claeys, M., Dommen, J., Donahue, N. M., George, C., Goldstein, A. H., Hamilton, J. F., Herrmann, H., Hoffmann, T., Iinuma, Y., Jang, M., Jenkin, M. E., Jimenez, J. L., Kiendler-Scharr, A., Maenhaut, W., McFiggans, G., Mentel, T. F., Monod, A., Prévôt, A. S. H., Seinfeld, J. H., Surratt, J. D., Szmigielski, R., and Wildt, J.: The formation, properties and impact of secondary organic aerosol: current and emerging issues, *Atmos. Chem. Phys.*, 9, 5155-5236, 10.5194/acp-9-5155-2009, 2009.
- Hu, W., Campuzano-Jost, P., Palm, B., Day, D., Ortega, A., Hayes, P., Krechmer, J., Chen, Q., Kuwata, M., and Liu, Y.: Characterization of a real-time tracer for Isoprene Epoxydiols-derived Secondary Organic Aerosol (IEPOX-SOA) from aerosol mass spectrometry measurements, *Atmos. Chem. Phys. Discuss.*, 15, 11223-11276, 2015.
- Karambelas, A., Pye, H. O., Budisulistiorini, S. H., Surratt, J. D., and Pinder, R. W.: Contribution of isoprene epoxydiol to urban organic aerosol: evidence from modeling and measurements, *Environ. Sci. Technol. Lett.*, 1, 278-283, 2014.
- Liao, J., Froyd, K. D., Murphy, D. M., Keutsch, F. N., Yu, G., Wennberg, P. O., St Clair, J. M., Crouse, J. D., Wisthaler, A., and Mikoviny, T.: Airborne measurements of organosulfates over the continental US, *J. Geophys. Res. A.*, 120, 2990-3005, 2015.
- Lin, Y.-H., Zhang, Z., Docherty, K. S., Zhang, H., Budisulistiorini, S. H., Rubitschun, C. L., Shaw, S. L., Knipping, E. M., Edgerton, E. S., and Kleindienst, T. E.: Isoprene epoxydiols as precursors to secondary organic aerosol formation: acid-catalyzed reactive uptake studies with authentic compounds, *Environ. Sci. Technol.*, 46, 250-258, 2012.
- Lin, Y.-H., Zhang, H., Pye, H. O., Zhang, Z., Marth, W. J., Park, S., Arashiro, M., Cui, T., Budisulistiorini, S. H., and Sexton, K. G.: Epoxide as a precursor to secondary organic aerosol formation from isoprene photooxidation in the presence of nitrogen oxides, *Proc. Natl. Acad. Sci.*, 110, 6718-6723, 2013a.

- Lin, Y. H., Knipping, E. M., Edgerton, E. S., Shaw, S. L., and Surratt, J. D.: Investigating the influences of SO<sub>2</sub> and NH<sub>3</sub> levels on isoprene-derived secondary organic aerosol formation using conditional sampling approaches, *Atmos. Chem. Phys.*, 13, 8457-8470, 10.5194/acp-13-8457-2013, 2013b.
- Lin, Y.-H., Budisulistiorini, S. H., Chu, K., Siejack, R. A., Zhang, H., Riva, M., Zhang, Z., Gold, A., Kautzman, K. E., and Surratt, J. D.: Light-absorbing oligomer formation in secondary organic aerosol from reactive uptake of isoprene epoxydiols, *Environ. Sci. Technol.*, 48, 12012-12021, 2014.
- Lopez-Hilfiker, F. D., Claudia Mohr, Emma L. D'Ambro, Anna Lutz, Theran P. Riedel, Cassandra J. Gaston, Siddharth Iyer et al.: Molecular Composition and Volatility of Organic Aerosol in the Southeastern US: Implications for IEPOX Derived SOA. *Environ. Sci. Technol.*, 50, no. 5, 2200-2209, 2016.
- McNeill, V. F. Aqueous organic chemistry in the atmosphere: Sources and chemical processing of organic aerosols. *Environ. Sci. Technol.*, 49(3), 1237-1244, 2015.
- Paulot, F., Crouse, J. D., Kjaergaard, H. G., Kürten, A., Clair, J. M. S., Seinfeld, J. H., & Wennberg, P. O.: Unexpected epoxide formation in the gas-phase photooxidation of isoprene. *Science*, 325(5941), 730-733, 2009.
- Pope, C. A., and Dockery, D. W.: Health Effects of Fine Particulate Air Pollution: Lines that Connect, *J. Air Waste Manag. Assoc.*, 56, 709-742, 10.1080/10473289.2006.10464485, 2006.
- Pye, H. O., Pinder, R. W., Piletic, I. R., Xie, Y., Capps, S. L., Lin, Y.-H., Surratt, J. D., Zhang, Z., Gold, A., and Luecken, D. J.: Epoxide pathways improve model predictions of isoprene markers and reveal key role of acidity in aerosol formation, *Environ. Sci. Technol.*, 47, 11056-11064, 2013.
- Riva, M., Budisulistiorini, S. H., Zhang, Z., Gold, A., and Surratt, J. D.: Chemical characterization of secondary organic aerosol constituents from isoprene ozonolysis in the presence of acidic aerosol, *Atmos. Environ.*, 2016.
- Schwantes, R. H., Teng, A. P., Nguyen, T. B., Coggon, M. M., Crouse, J. D., St. Clair, J. M., Zhang, X., Schilling, K. A., Seinfeld, J. H., and Wennberg, P. O.: Isoprene NO<sub>3</sub> Oxidation Products from the RO<sub>2</sub>+ HO<sub>2</sub> Pathway, *J. Phys. Chem. A*, 2015.

- Surratt, J. D., Murphy, S. M., Kroll, J. H., Ng, N. L., Hildebrandt, L., Sorooshian, A., Szmigielski, R., Vermeylen, R., Maenhaut, W., and Claeys, M.: Chemical composition of secondary organic aerosol formed from the photooxidation of isoprene, *J. Phys. Chem. A*, 110, 9665-9690, 2006.
- Surratt, J. D., Kroll, J. H., Kleindienst, T. E., Edney, E. O., Claeys, M., Sorooshian, A., Ng, N. L., Offenberg, J. H., Lewandowski, M., and Jaoui, M.: Evidence for organosulfates in secondary organic aerosol, *Environ. Sci. Technol.*, 41, 517-527, 2007a.
- Surratt, J. D., Chan, A. W., Eddingsaas, N. C., Chan, M., Loza, C. L., Kwan, A. J., Hersey, S. P., Flagan, R. C., Wennberg, P. O., and Seinfeld, J. H.: Reactive intermediates revealed in secondary organic aerosol formation from isoprene, *Proc. Natl. Acad. Sci.*, 107, 6640-6645, 2010.
- Wang, W., Kourtchev, I., Graham, B., Cafmeyer, J., Maenhaut, W., and Claeys, M.: Characterization of oxygenated derivatives of isoprene related to 2-methyltetrols in Amazonian aerosols using trimethylsilylation and gas chromatography/ion trap mass spectrometry, *Rapid Commun. Mass Spectrom.*, 19, 1343-1351, 2005.
- Xu, L., Guo, H., Boyd, C. M., Klein, M., Bougiatioti, A., Cerully, K. M., Hite, J. R., Isaacman-VanWertz, G., Kreisberg, N. M., and Knote, C.: Effects of anthropogenic emissions on aerosol formation from isoprene and monoterpenes in the southeastern United States, *Proc. Natl. Acad. Sci.*, 112, 37-42, 2015.
- Zhang, Z., Lin, Y.-H., Zhang, H., Surratt, J., Ball, L., and Gold, A.: Technical Note: Synthesis of isoprene atmospheric oxidation products: isomeric epoxydiols and the rearrangement products cis- and trans-3-methyl-3,4-dihydroxytetrahydrofuran, *Atmos. Chem. Phys.*, 12, 8529-8535, 2012.
